# Supplementary material for: Porous α-Fe2O3 nanosphere-based H2S sensor with fast response, high selectivity and enhanced sensitivity
Source: Royal Society of Chemistry journal article supplement (doi:10.1039/c3ta12253k), 2013-01-01
Supplement: c3ta12253k.pdf [file c3ta12253k.pdf]

## ***Experimental***

### ***Preparation of $\alpha$ -Fe<sub>2</sub>O<sub>3</sub> nanospheres***

In a typical synthesis, 0.5 mmol of FeCl<sub>2</sub>·4H<sub>2</sub>O and 1.5 mmol of sodium acetate were dissolved into 40 ml of distilled water, and then heated by microwave method with power of 800 W for 10 min. Finally, the product was cooled, washed, dried and annealed at 500 °C for 2h in order to study their gas-sensing performance.

### ***Preparation of $\alpha$ -Fe<sub>2</sub>O<sub>3</sub> nanorods***

The preparation procedure of  $\alpha$ -Fe<sub>2</sub>O<sub>3</sub> nanorods was the same as that of the  $\alpha$ -Fe<sub>2</sub>O<sub>3</sub> nanospheres, except the amount of sodium acetate was changed into 0.5 mmol from 1.5 mmol.

### ***Characterization***

The morphology and structural characteristics were observed using X-ray diffraction (XRD, Rigaku D/max 2500 diffractometer), scanning electron microscopy (SEM, Hitachi S4800) and transmission electron microscope (TEM; JEOL 2010 with an accelerating voltage of 200 kV).

### ***Gas sensing measurements***

The fabrication and testing principles of the gas sensor are similar to that described in our previous reports. Firstly, the  $\alpha\text{-Fe}_2\text{O}_3$  samples were mixed with terpineol to form a paste and then coated onto the outside surface of an alumina tube with a diameter of 1 mm and a length of 5 mm. A platinum coil through the tube was employed as a heater to control the operating temperature. To improve their stability and repeatability, the gas sensors were aged at 300 °C for 10 h in air. Here, the sensing properties of the sensors were measured by a NS-4003 series gas-sensing measurement system (China Zhong-Ke Micro-nano IOT, Internet of Things, Ltd.). The relative humidity (RH) is about 45%. The response and recovery times were defined as the time required for a change of the resistance to reach 90 % of the equilibrium value after injecting and that for removing the detected gas, respectively.

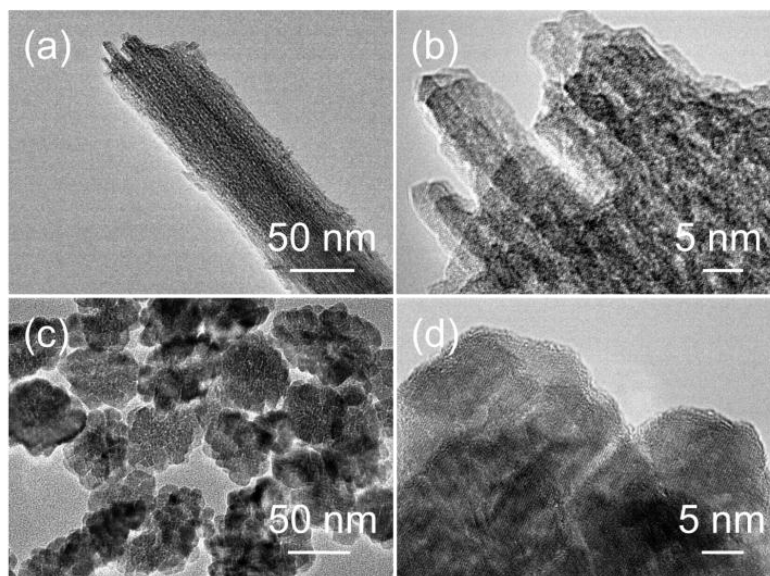

**Fig. S1** TEM images of nanostructured iron oxides: (a and b) nanorods; and (c and d) nanoparticles.
